# Supplementary material for: Hsp60 exerts a tumor suppressor function by inducing cell differentiation and inhibiting invasion in hepatocellular carcinoma
Source: PubMed Central journal article supplement (PMC5356605; doi:10.18632/oncotarget.12185), 2016-09-22
Supplement: oncotarget-07-68976-s001.pdf [file oncotarget-07-68976-s001.pdf]

## Hsp60 exerts a tumor suppressor function by inducing cell differentiation and inhibiting invasion in hepatocellular carcinoma

### SUPPLEMENTARY FIGURES

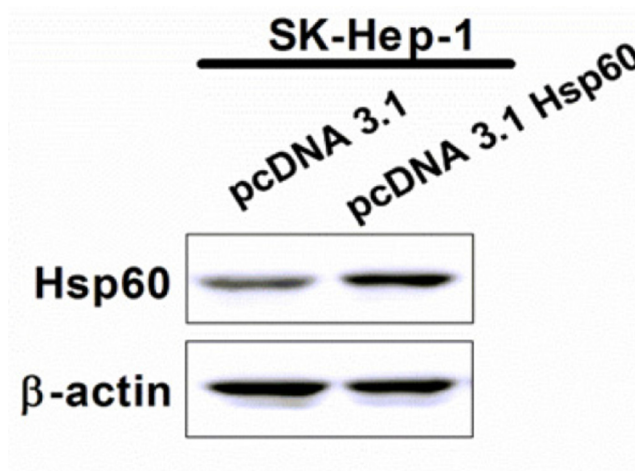

**Supplementary Figure S1: Western blot analysis for protein expression of Hsp60 in HCC cells.** Hsp60 protein expression was analyzed in SK-Hep-1 cells transiently transfected with an expression vector pcDNA3.1 Hsp60 or pcDNA3.1 empty vector.

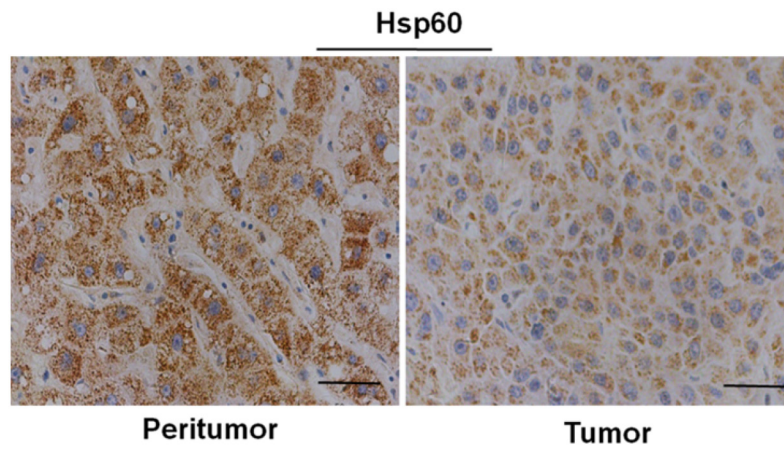

**Supplementary Figure S2: Representative Hsp60 immunohistochemical (IHC) staining images of HCC and peritumor tissues.** The IHC staining score of these sections were calculated according description in “MATERIALS AND METHODS”. (n=295; Scale bars, 20 $\mu$ m).

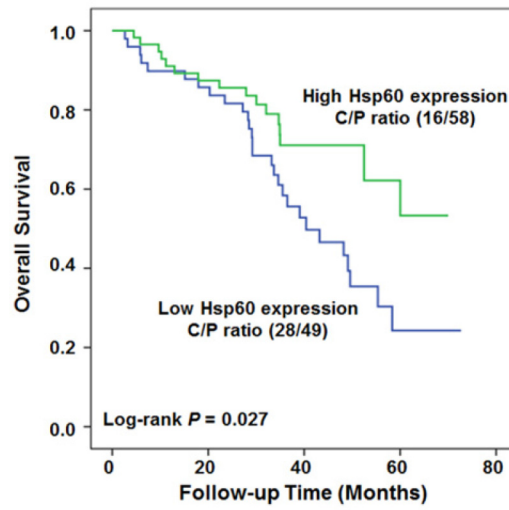

Supplementary Figure S3: Kaplan-Meier curve of overall survival (OS) in HCC patients based on Hsp60 expression ratio of cancer and pericancer tissues (C/P) (n=107; P=0.027).

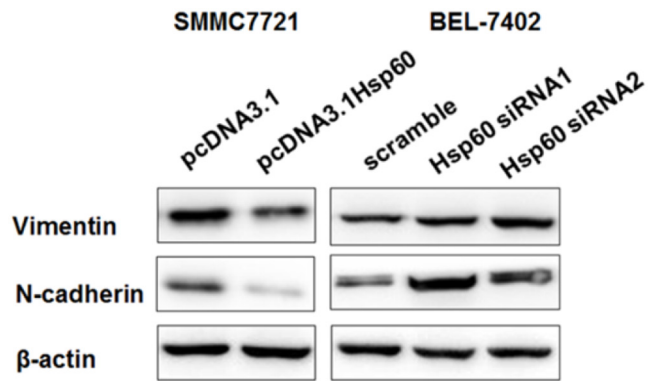

**Supplementary Figure S4: Western blot analysis of differentiation-related markers Vimentin and N-cadherin in BEL-7402 and SMMC7721 cells.** BEL-7402 and SMMC7721 cells were transiently transfected with either Hsp60 siRNA or Hsp60 expression vector, respectively.

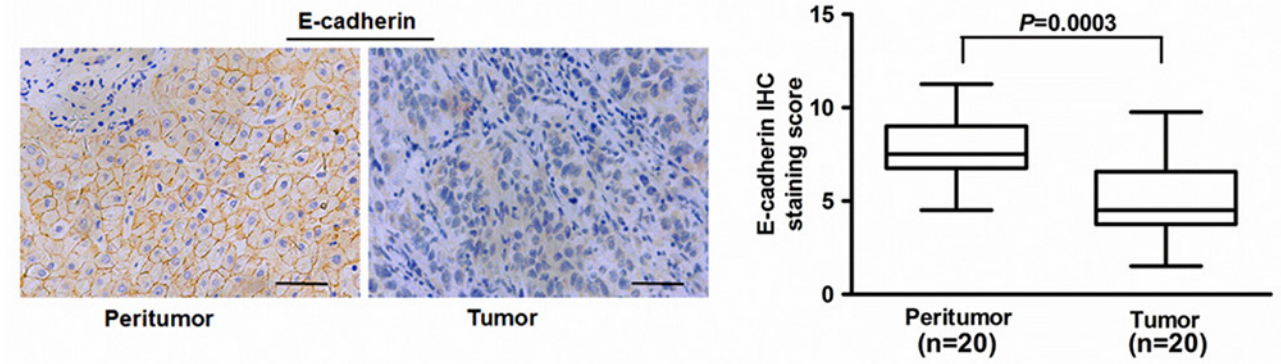

Supplementary Figure S5: Representative immunohistochemical (IHC) staining images and IHC score of E-cadherin in paired HCC tissues(n=20; Scale bars, 20μm).

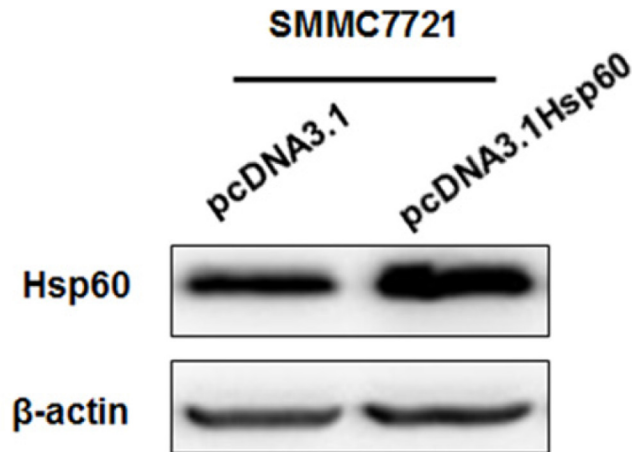

**Supplementary Figure S6: Western blot analysis for protein expression of Hsp60 in HCC cells.** Hsp60 protein expression was analyzed in SMMC7721 cells stable transfected with expression vector pcDNA3.1 Hsp60 or pcDNA3.1 empty vector.

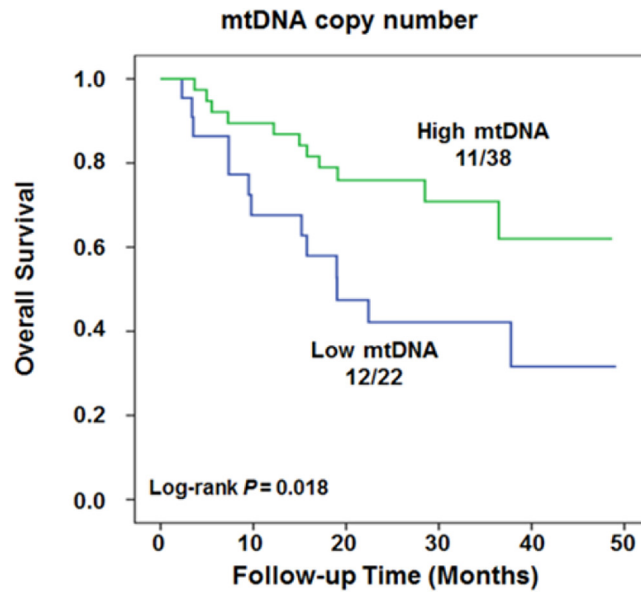

Supplementary Figure S7: Kaplan–Meier curves of overall survival (OS) in 60 HCC patients with different mtDNA content ( $P=0.018$ ).
